# Supplementary material for: A biomolecule-assisted, cost-efficient route for growing tunable CuInS2 films for green energy application
Source: Royal Society of Chemistry journal article supplement (doi:10.1039/c6ra27294k), 2017-01-01
Supplement: c6ra27294k1.pdf [file c6ra27294k1.pdf]

## Supplementary Information

**Supplementary Table 1.** Summarized literature data that were used for the analysis of XRD and electron diffraction data listed for the region of the XRD analysis (20-100° 2 $\theta$ ). Not all possible values are included, e.g. for all the compounds close d-values are summarized. For L-cystine a large number of d-spacings occur, which are very close to each other and are presented here by an average value.

|                    |            |                          |                  |       |       |            |            |            |            |            |            |       |            |            |       |            |            |            |            |       |       |
|--------------------|------------|--------------------------|------------------|-------|-------|------------|------------|------------|------------|------------|------------|-------|------------|------------|-------|------------|------------|------------|------------|-------|-------|
| CuInS <sub>2</sub> | tetragonal | ICSD 189077 <sup>1</sup> | 2 $\theta$ [deg] | 20.83 | 32.49 | 37.78      | 54.31      | 64.90      | 80.70      | 89.41      |            |       |            |            |       |            |            |            |            |       |       |
|                    |            |                          | d [Å]            | 4.95  | 3.20  | 2.76       | 1.96       | 1.67       | 1.38       | 1.27       |            |       |            |            |       |            |            |            |            |       |       |
|                    |            |                          | hkl              | 101   | 112   | 200<br>004 | 204<br>220 | 312<br>116 | 400        | 316<br>332 |            |       |            |            |       |            |            |            |            |       |       |
| CuInS <sub>2</sub> | hexagonal  | ICSD 163489 <sup>2</sup> | 2 $\theta$ [deg] | 30.66 | 32.31 | 34.77      | 45.14      | 54.51      | 59.22      | 64.81      | 66.29      | 73.39 | 84.70      | 91.00      | 92.23 | 96.18      |            |            |            |       |       |
|                    |            |                          | d [Å]            | 3.38  | 3.21  | 2.99       | 2.33       | 1.95       | 1.81       | 1.67       | 1.64       | 1.50  | 1.33       | 1.25       | 1.24  | 1.20       |            |            |            |       |       |
|                    |            |                          | hkl              | 100   | 002   | 101        | 102        | 110        | 103        | 112<br>200 | 201        | 202   | 203        | 211        | 114   | 105<br>212 |            |            |            |       |       |
| Cu <sub>2</sub> S  | tetragonal | ICSD 16550 <sup>3</sup>  | 2 $\theta$ [deg] | 27.47 | 31.84 | 36.91      | 38.09      | 45.67      | 46.64      | 53.23      | 54.08      | 56.71 | 60.91      | 63.34      | 67.30 | 73.48      | 79.34      | 84.50      | 90.84      | 93.00 | 96.69 |
|                    |            |                          | d [Å]            | 3.77  | 3.26  | 2.83       | 2.74       | 2.31       | 2.26       | 2.00       | 1.97       | 1.88  | 1.76       | 1.70       | 1.61  | 1.50       | 1.40       | 1.33       | 1.26       | 1.23  | 1.20  |
|                    |            |                          | hkl              | 101   | 102   | 110<br>004 | 111<br>103 | 104        | 113        | 114<br>200 | 201<br>105 | 202   | 203        | 212<br>106 | 213   | 107        | 215<br>221 | 108<br>223 | 311<br>224 | 312   | 217   |
| Cu <sub>2</sub> S  | hexagonal  | ICSD 159437 <sup>4</sup> | 2 $\theta$ [deg] | 30.32 | 30.74 | 43.72      | 53.86      | 56.83      | 63.06      | 64.02      | 71.79      | 82.13 | 96.25      |            |       |            |            |            |            |       |       |
|                    |            |                          | d [Å]            | 3.42  | 3.38  | 2.40       | 1.98       | 1.88       | 1.71       | 1.69       | 1.53       | 1.36  | 1.20       |            |       |            |            |            |            |       |       |
|                    |            |                          | hkl              | 100   | 002   | 102        | 110        | 103        | 200<br>112 | 004        | 202        | 203   | 204<br>112 |            |       |            |            |            |            |       |       |

|                                    |            |                            |                 |             |             |             |             |             |               |       |               |             |             |       |               |             |             |               |               |               |                |
|------------------------------------|------------|----------------------------|-----------------|-------------|-------------|-------------|-------------|-------------|---------------|-------|---------------|-------------|-------------|-------|---------------|-------------|-------------|---------------|---------------|---------------|----------------|
| <b>In<sub>2</sub>S<sub>3</sub></b> | tetragonal | ICSD 183879 <sup>5</sup>   | <b>2θ [deg]</b> | 20.15       | 20.89       | 25.55       | 26.16       | 27.16       | 27.91         | 30.61 | 31.95         | 33.41       | 38.06       | 38.78 | 42.40         | 47.95       | 51.10       | 55.98         | 58.80         | 63.33         | 76.77          |
|                                    |            |                            | <b>d [Å]</b>    | 5.11        | 4.93        | 4.05        | 3.95        | 3.81        | 3.71          | 3.39  | 3.25          | 3.11        | 2.74        | 2.69  | 2.47          | 2.20        | 2.07        | 1.91          | 1.82          | 1.70          | 1.44           |
|                                    |            |                            | <b>hkl</b>      | 112         | 105         | 008         | 107         | 200<br>116  | 202           | 211   | 213<br>109    | 206         | 217         | 220   | 219<br>303    | 2012<br>316 | 323<br>1015 | 2212<br>400   | 329<br>2115   | 420           | 4212           |
| <b>L-cystine</b>                   | hexagonal  | COD ID1513328 <sup>6</sup> | <b>2θ [deg]</b> | 21.97       | 22.05       | 23.19       | 24.63       | 25.53       | 31.37         | 33.43 | 34.18         | 38.55       | 38.73       | 38.97 | 40.37         | 44.97       | 45.91       | 49.35         | 52.45         | 54.64         | 70.96          |
|                                    |            |                            | <b>d [Å]</b>    | 4.69        | 4.68        | 4.45        | 4.19        | 4.05        | 3.31          | 3.11  | 3.04          | 2.71        | 2.70        | 2.68  | 2.59          | 2.34        | 2.29        | 2.14          | 2.02          | 1.95          | 1.54           |
|                                    |            |                            | <b>hkl</b>      | 010<br>-110 | 011<br>-111 | 014<br>-114 | 016<br>-116 | 017<br>-117 | 0112<br>-1112 | 00-18 | 0114<br>-1114 | -120<br>112 | -122<br>112 | -123  | 0118<br>-1118 | 022<br>-222 | -1213       | -1216<br>1116 | 0214<br>-2214 | 0216<br>-2216 | -1318<br>-2318 |
| <b>SnO<sub>2</sub></b>             | tetragonal | ICSD 647469 <sup>7</sup>   | <b>2θ [deg]</b> | 30.97       | 39.54       | 44.37       | 45.58       | 49.94       | 60.92         | 64.55 | 68.29         | 73.31       | 76.86       | 78.41 | 85.14         | 94.83       | 98.07       |               |               |               |                |
|                                    |            |                            | <b>d [Å]</b>    | 3.35        | 2.64        | 2.37        | 2.31        | 2.12        | 1.76          | 1.68  | 1.59          | 1.50        | 1.44        | 1.42  | 1.32          | 1.21        | 1.18        |               |               |               |                |
|                                    |            |                            | <b>hkl</b>      | 110         | 101         | 200         | 111         | 210         | 211           | 220   | 002           | 310         | 112         | 301   | 202           | 321         | 400         |               |               |               |                |
| <b>CuS</b>                         | hexagonal  | ICSD 63327 <sup>8</sup>    | <b>2θ [deg]</b> | 31.61       | 32.26       | 34.14       | 37.09       | 38.35       | 45.43         | 50.51 | 51.94         | 56.30       | 62.09       | 67.52 | 70.18         | 80.14       | 82.73       | 88.69         | 93.60         | 95.32         |                |
|                                    |            |                            | <b>d [Å]</b>    | 3.28        | 3.22        | 3.05        | 2.81        | 2.72        | 2.32          | 2.10  | 2.04          | 1.90        | 1.73        | 1.61  | 1.56          | 1.39        | 1.35        | 1.28          | 1.23          | 1.21          |                |
|                                    |            |                            | <b>hkl</b>      | 100         | 101         | 102         | 103         | 006         | 105           | 106   | 008           | 110<br>107  | 108         | 202   | 116<br>203    | 118         | 1011        | 208           | 212           | 213           |                |

**Supplementary Table 2.** SEM EDX quantifications results of films A, B and C.

|                      | Cu     | In     | S       |
|----------------------|--------|--------|---------|
| <b>film A [at.%]</b> | 24 ± 4 | 23 ± 2 | 53 ± 7  |
| <b>normalized</b>    | 1.0    | 1.0    | 2.2     |
| <b>film B</b>        | 20 ± 1 | 28 ± 2 | 51 ± 1  |
| <b>normalized</b>    | 1.0    | 1.4    | 2.5     |
| <b>film C</b>        | 20 ± 5 | 28 ± 4 | 51 ± 11 |
| <b>normalized</b>    | 1.0    | 1.4    | 2.5     |

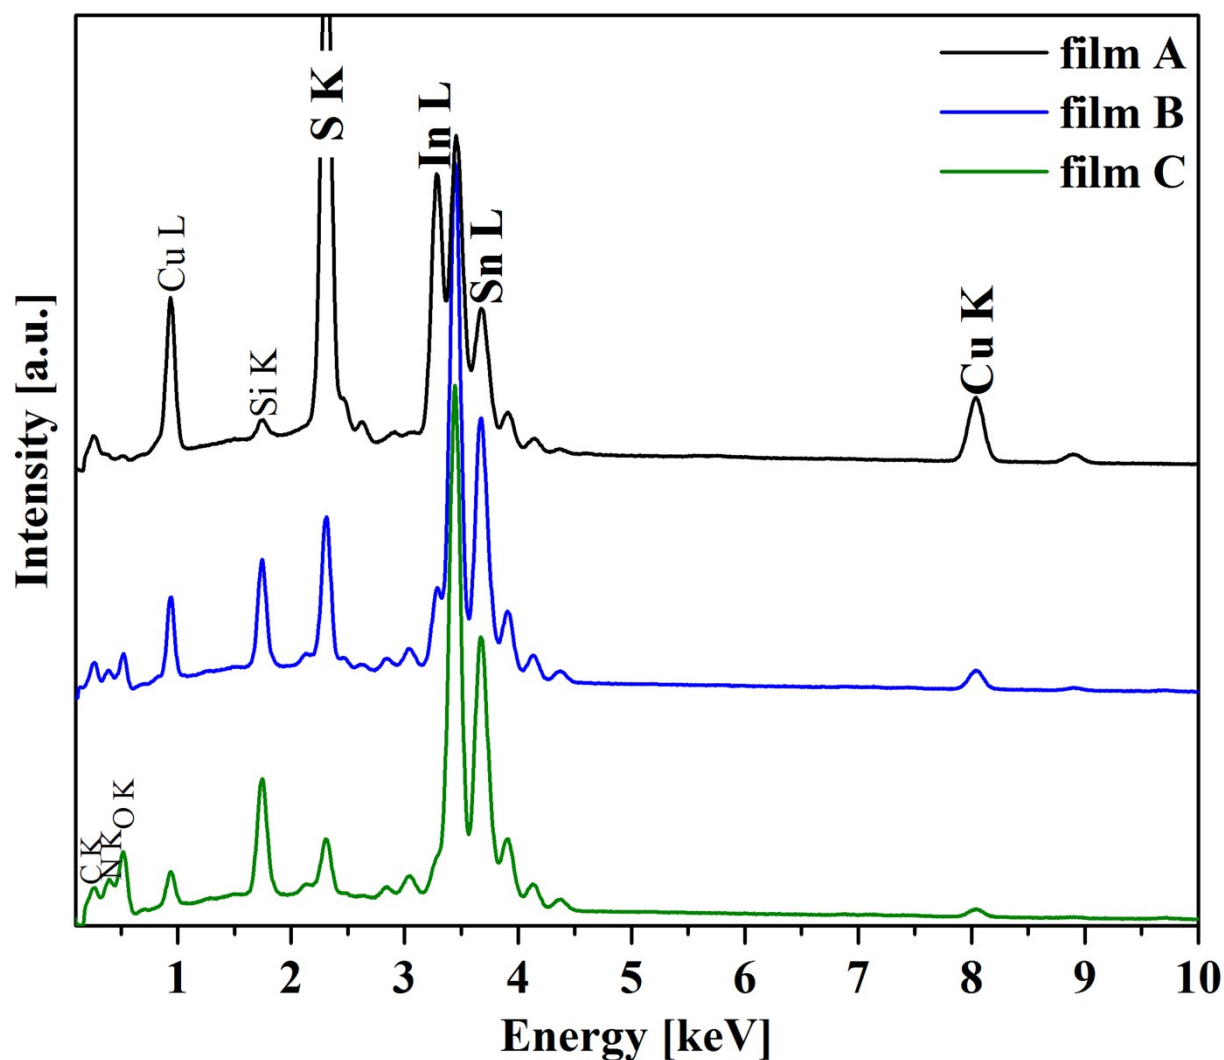

**Supplementary Figure 1.** EDX spectra of films A, B and C obtained in the SEM at 20 kV acceleration voltage. Sn, Si and O signals stem from the FTO coated glass substrate.

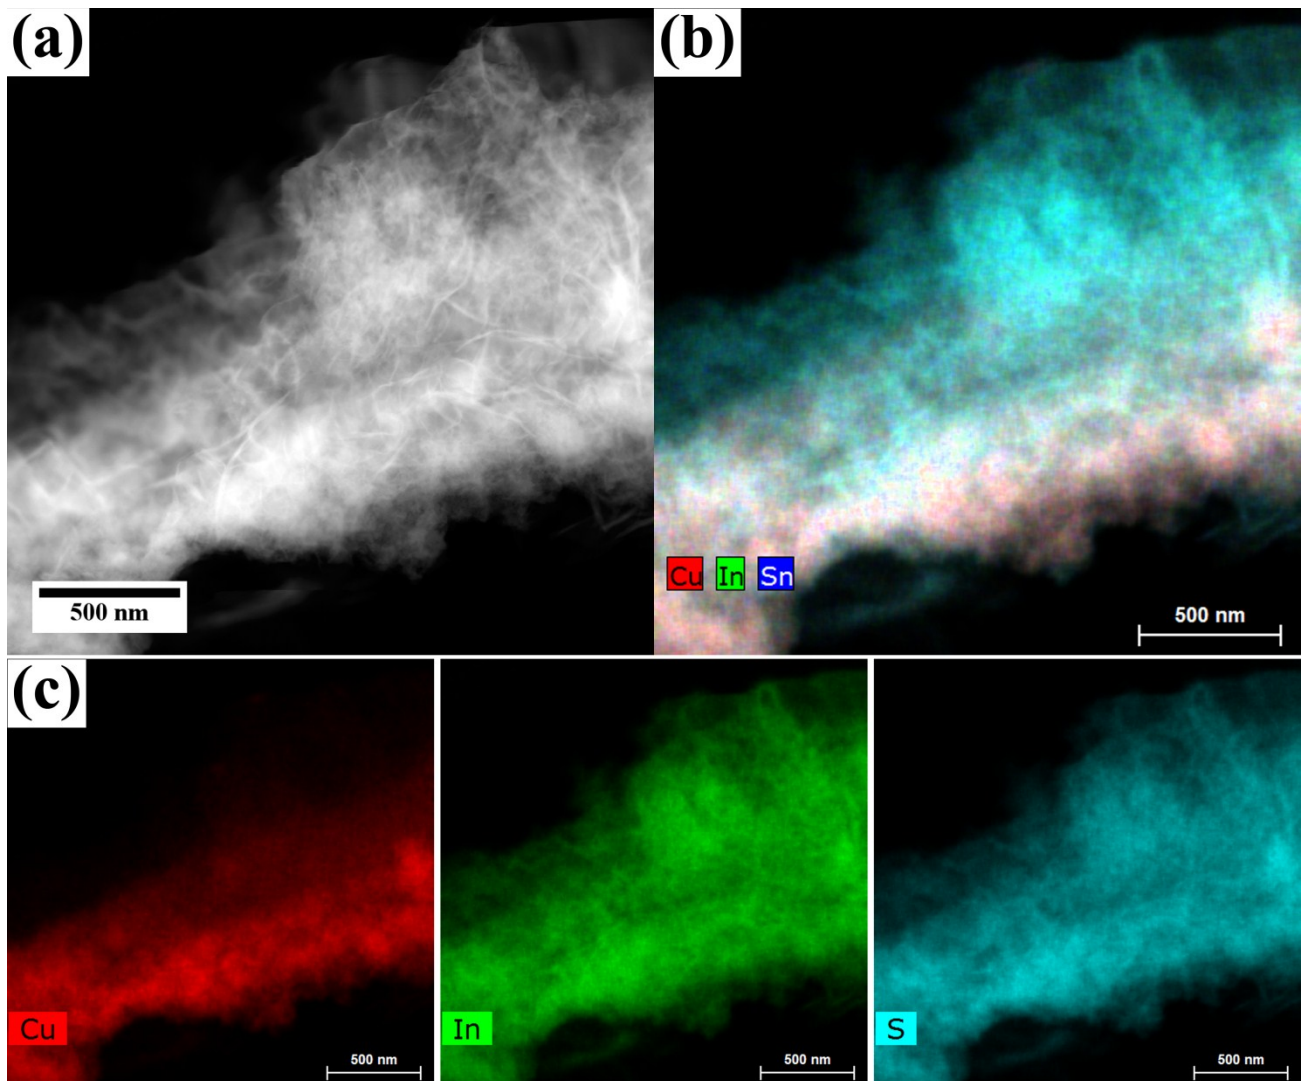

**Supplementary Figure 2.** (a) STEM HAADF image of a nearly cross sectional part of the scratch sample of film A. (b) according EDX map overlay of Cu, In and S signal. (c) Single Cu, In and S EDX maps of the same area.

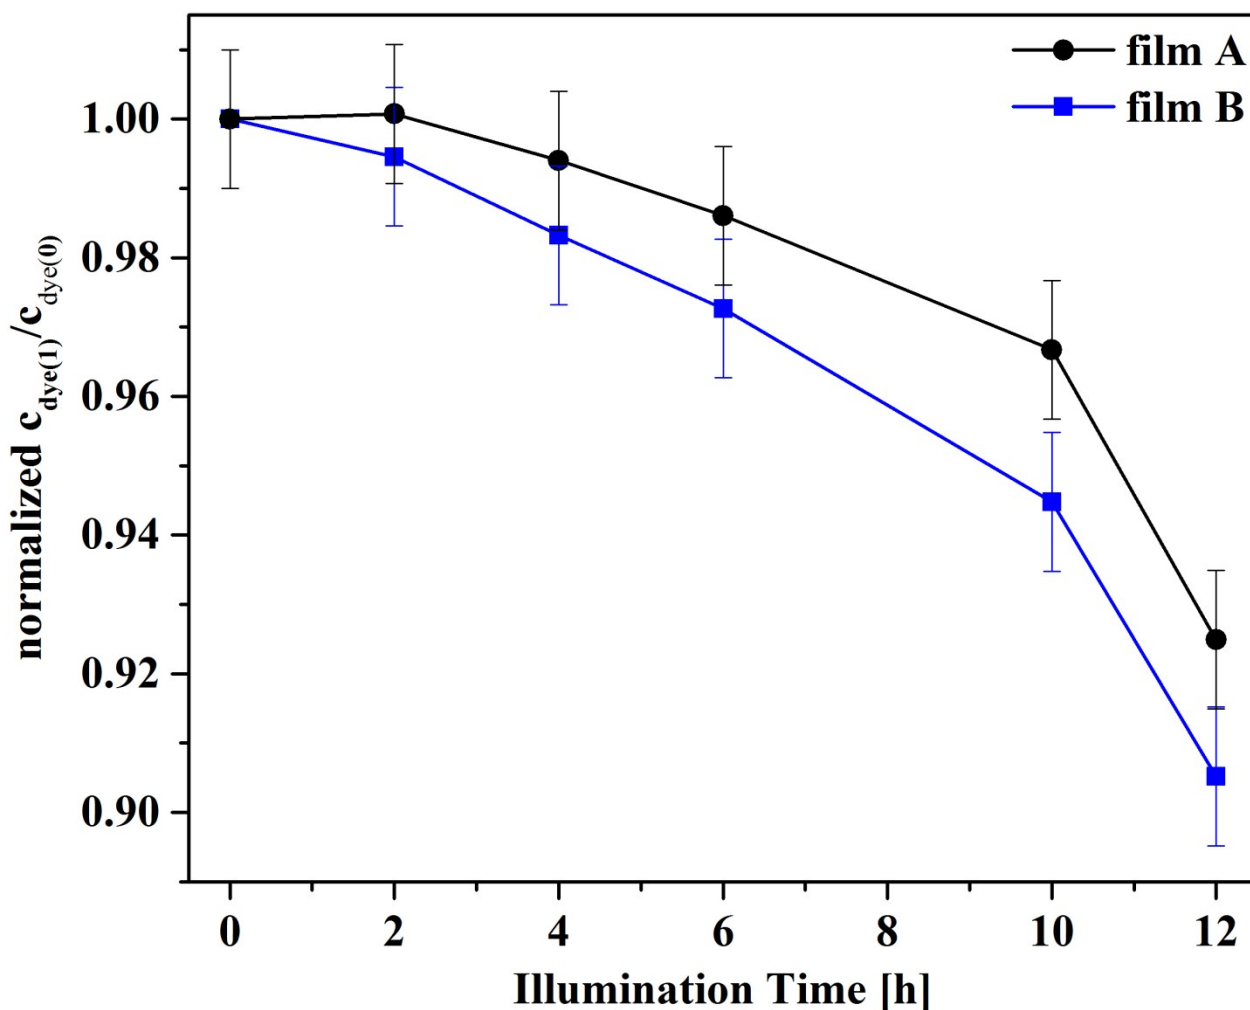

**Supplementary Figure 3** First dye degradation results of films A (black) and B (blue) under solar illumination. The used dye is rhodamine B.

## References

1. C. H. Ho, C. C. Pan, J. R. Cai, G. T. Huang, D. O. Dumcenco, Y. S. Huang, K. K. Tiong and C. C. Wu, *Solid State Phenomena*, 2013, **194**, 133-138.
2. Y. Qi, Q. Liu, K. Tang, Z. Liang, Z. Ren and X. Liu, *The Journal of Physical Chemistry C*, 2009, **113**, 3939-3944.
3. A. Janosi, *Acta Crystallographica*, 1964, **17**, 311-312.
4. P. Lukashev, W. R. L. Lambrecht, T. Kotani and M. van Schilfgaarde, *Physical Review B*, 2007, **76**, 195202.
5. A. Lafond, X. Rocquefelte, M. Paris, C. Guillot-Deudon and V. Jouenne, *Chemistry of Materials*, 2011, **23**, 5168-5176.
6. S. A. Moggach, D. R. Allan, S. Parsons, L. Sawyer and J. E. Warren, *Journal of Synchrotron Radiation*, 2005, **12**, 598-607.
7. G. J. McCarthy and J. M. Welton, *Powder Diffraction*, 1989, **4**, 156-159.
8. H. Fjellvag, F. Gronvold, S. Stolen, A. F. Andresen, R. Mueller Kaefer and A. Simon, *Zeitschrift für Kristallographie*, 1988, **184**, 111-121.
